# Supplementary material
Source: Preprints.org preprint supplement (doi:10.20944/preprints202009.0163.v1)
Supplement: Supplementary file 1 [file supplementary]

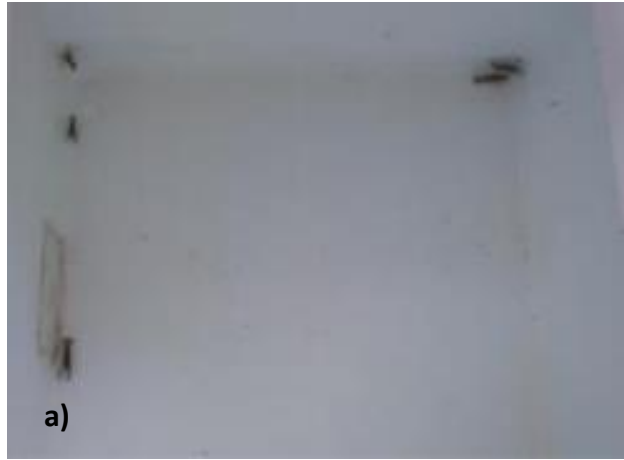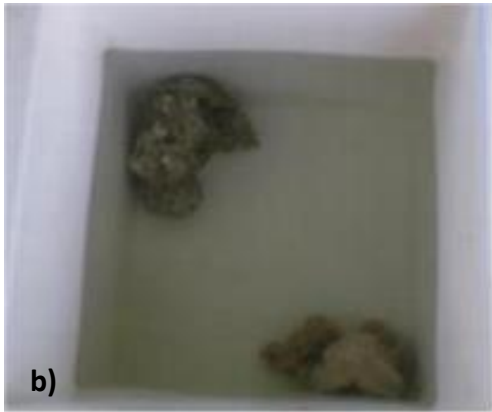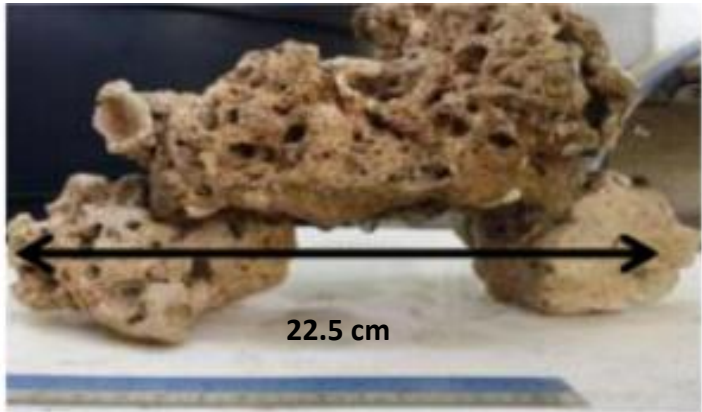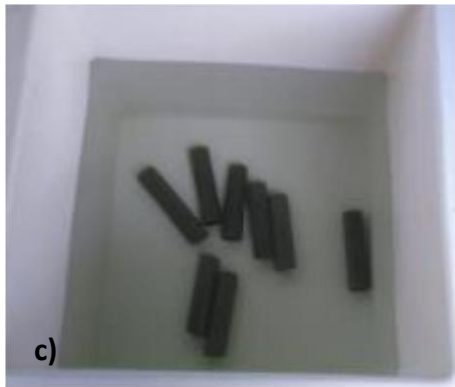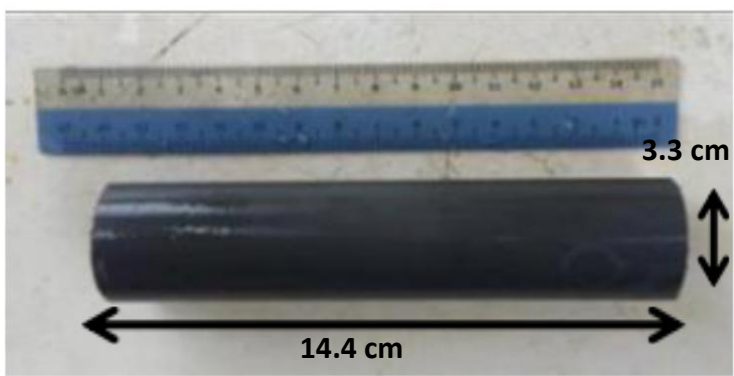

Figure 1: Three different treatments; a) Treatment 1 (control), b) Treatment 2 (with coral) and c) Treatment 3 (with pipes)

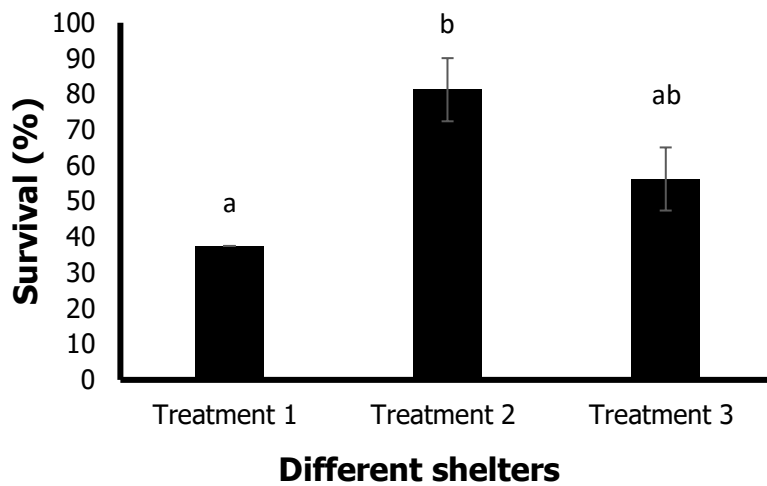

Figure 2: Survival in juvenile red claw, *Cherax quadricarinatus* after 60 days. Bars with different letters (a, b, ab) were significantly different ( $p < 0.05$ ) (mean  $\pm$  S.D.)

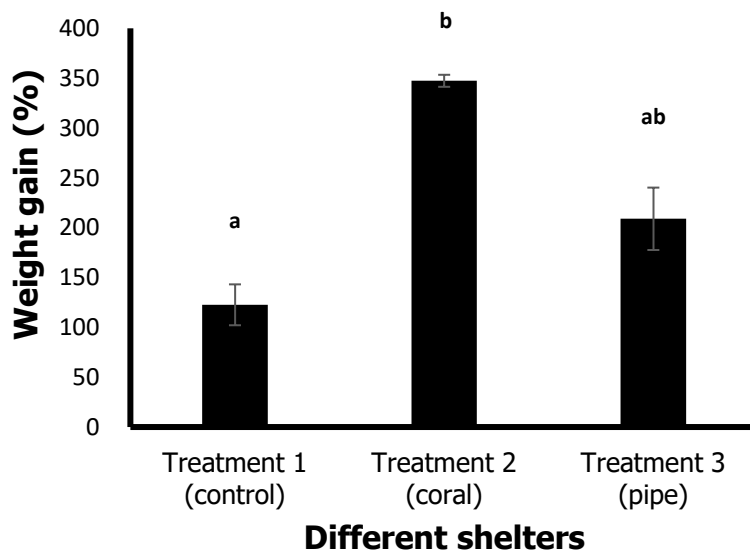

Figure 3: Weight gain in juvenile red claw, *Cherax quadricarinatus* after 60 days. Bars with different letters (a, b, ab) were significantly different ( $p < 0.05$ ) (mean  $\pm$  S.D.)

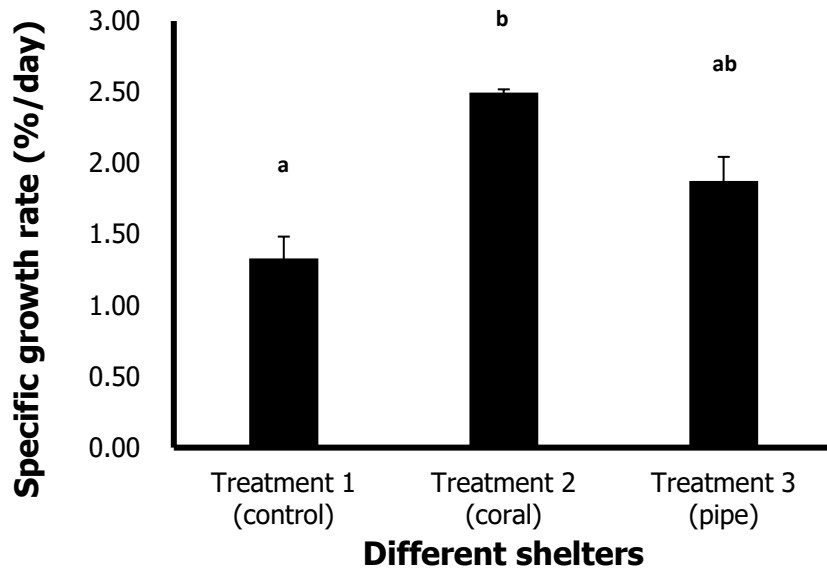

Figure 4: Specific growth rates in juvenile red claw, *Cherax quadricarinatus* after 60 days. Bars with different letters (a, b, ab) were significantly different ( $p < 0.05$ ) (mean  $\pm$  S.D.)

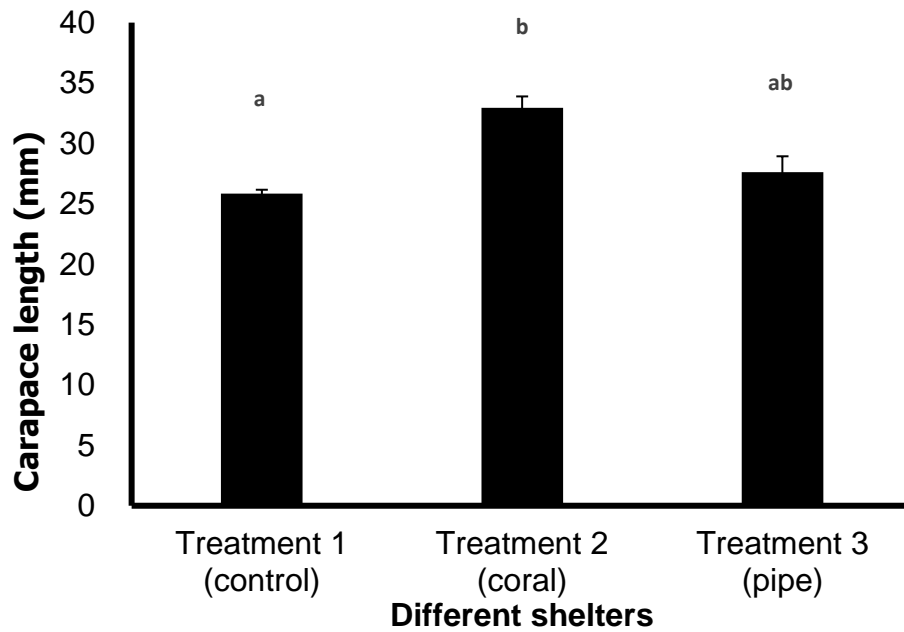

Figure 5: Carapace length in red claw, *Cherax quadricarinatus* after 60 days. Bars with different letters (a, b, ab) were significantly different ( $p < 0.05$ ) (mean  $\pm$  S.D.)

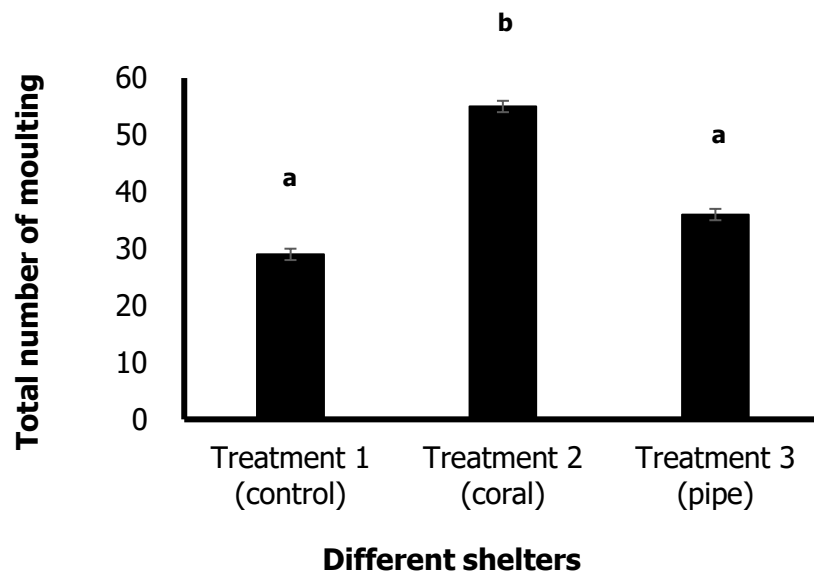

Figure 6: Total number of moulting in juvenile red claw, *Cherax quadricarinatus* after 60 days. Bars with different letters (a, b) were significantly different ( $p < 0.05$ ) (mean  $\pm$  S.D.)
